# Supplementary material for: Sustainability Perception of Italian Consumers: Is it Possible to Replace Meat, and What Is the Best Alternative?
Source: MDPI journal article supplement (doi:10.3390/nu15183861), 2023-09-05
Supplement: s1 [file s1]

**Supplementary Materials: Table S1 - Answers to all the questions (%)**

| <b>Q1. To what extent do you agree with each of the following statements?</b>                                                                                          | <b>1-2</b> | <b>3-4</b> | <b>5-6</b> | <b>7-8</b> | <b>9-10</b> |
|------------------------------------------------------------------------------------------------------------------------------------------------------------------------|------------|------------|------------|------------|-------------|
| <b>[answer from 1 (strongly disagree) to 10 (strongly agree)] (%)</b>                                                                                                  |            |            |            |            |             |
| Q1.1 My food habits negatively affect the environment                                                                                                                  | 23         | 22         | 34         | 16         | 5           |
| Q1.2 When compared to car use, food habits have only little impact on the environment                                                                                  | 12         | 19         | 38         | 22         | 9           |
| Q1.3 I pay attention to the impact that my food choices have on the environment.                                                                                       | 7          | 13         | 36         | 30         | 14          |
| Q1.4 Sustainability issues influence my food choices.                                                                                                                  | 10         | 15         | 34         | 30         | 11          |
| Q1.5 I improved my habits in favor of food sustainability, following the government's advertising campaigns.                                                           | 16         | 16         | 33         | 26         | 9           |
| Q1.6 I do not want someone to tell me or decide for me what I should eat or not                                                                                        | 10         | 13         | 35         | 24         | 18          |
| <b>Q2. What comes to your mind when thinking about “sustainable” food? (%)</b>                                                                                         | <b>Yes</b> |            |            |            |             |
| Q2.1 Low environmental impact                                                                                                                                          | 89         |            |            |            |             |
| Q2.2 Availability and affordability of food for all                                                                                                                    | 58         |            |            |            |             |
| Q2.3 Use of pesticides and GMOs to be avoided                                                                                                                          | 79         |            |            |            |             |
| Q2.4 Local supply chains                                                                                                                                               | 81         |            |            |            |             |
| Q2.5 Fair revenue for farmers                                                                                                                                          | 69         |            |            |            |             |
| Q2.6 High animal welfare standards                                                                                                                                     | 79         |            |            |            |             |
| Q2.7 Economic growth in the agri-food sector                                                                                                                           | 63         |            |            |            |             |
| Q2.8 Minimally processed, traditional                                                                                                                                  | 78         |            |            |            |             |
| Q2.9 Healthy                                                                                                                                                           | 81         |            |            |            |             |
| <b>Q3. What are the main reasons preventing you from eating (more) sustainably? (%)</b>                                                                                | <b>Yes</b> |            |            |            |             |
| Lack of information on how to do so                                                                                                                                    | 54         |            |            |            |             |
| Lack of clear labelling                                                                                                                                                | 61         |            |            |            |             |
| I'm not concerned with sustainability                                                                                                                                  | 41         |            |            |            |             |
| Lack of sustainable food products in my usual shopping places / eating places                                                                                          | 55         |            |            |            |             |
| Too expensive                                                                                                                                                          | 79         |            |            |            |             |
| I'm not willing to change my eating habits                                                                                                                             | 40         |            |            |            |             |
| Lack of time (to buy it, to cook it, etc.)                                                                                                                             | 49         |            |            |            |             |
| <b>Q4. To what extent do you agree with each of the following statements?</b>                                                                                          | <b>1-2</b> | <b>3-4</b> | <b>5-6</b> | <b>7-8</b> | <b>9-10</b> |
| <b>[answer from 1 (strongly disagree) to 10 (strongly agree)] (%)</b>                                                                                                  |            |            |            |            |             |
| Q4.1 I'm willing to buy mainly seasonal fruit and vegetables                                                                                                           | 2          | 5          | 17         | 28         | 48          |
| Q4.2 I'm willing to spend more money for sustainable food                                                                                                              | 9          | 16         | 34         | 31         | 10          |
| Q4.3 I'm willing to spend more money on food for which I'm sure that farmers get a fair price in return                                                                | 6          | 11         | 31         | 36         | 16          |
| Q4.4 I'm willing to cut down on red meat (beef, lamb and pork)                                                                                                         | 7          | 9          | 27         | 31         | 26          |
| Q4.5 I'm willing to cut down on dairy                                                                                                                                  | 9          | 11         | 28         | 29         | 23          |
| Q4.6 I am willing to waste less food at home, implementing anti-waste measures (e.g. shopping list, placing foods that expire first in front of the refrigerator, etc. | 1          | 4          | 16         | 28         | 51          |
| Q4.7 I'm willing to eat more vegetables/plant-based food, even if they're not to my taste                                                                              | 6          | 6          | 28         | 34         | 29          |
| Q4.8 I'm willing to change my eating habits, even if they are not environment-friendly                                                                                 | 4          | 10         | 26         | 36         | 24          |
| <b>Q5. Have you reduced (or plans to reduce) the consumption of red meat (beef, lamb and pork) for environmental reasons? (Tick only one answer) (%)</b>               | <b>Yes</b> |            |            |            |             |

|                                                                                                                                                                                                                  |            |                                    |                              |            |             |
|------------------------------------------------------------------------------------------------------------------------------------------------------------------------------------------------------------------|------------|------------------------------------|------------------------------|------------|-------------|
| Q5.1 I don't eat meat, because I'm vegetarian/vegan                                                                                                                                                              | 4          |                                    |                              |            |             |
| Q5.2 Yes, I've stopped eating red meat for environmental reasons<br>(though I'm not vegetarian/vegan)                                                                                                            | 7          |                                    |                              |            |             |
| Q5.3 Yes, I've reduced the consumption of red meat (but still eat it)                                                                                                                                            | 51         |                                    |                              |            |             |
| Q5.4 Yes, I'm intending to reduce the consumption of red meat for<br>environmental reasons                                                                                                                       | 10         |                                    |                              |            |             |
| Q5.5 Yes, I'm intending to stop eating red meat for environmental<br>reasons                                                                                                                                     | 1          |                                    |                              |            |             |
| Q5.6 No, I didn't reduce red meat consumption, nor do I intend to do it<br>due to environmental reasons                                                                                                          | 27         |                                    |                              |            |             |
| <b>Q6. With which protein source do you replace or would you<br/>preferably replace meat at meals? (%)</b>                                                                                                       | <b>Yes</b> |                                    |                              |            |             |
| Q6.1 Fish                                                                                                                                                                                                        | 77         |                                    |                              |            |             |
| Q6.2 Eggs                                                                                                                                                                                                        | 82         |                                    |                              |            |             |
| Q6.3 Dairy products                                                                                                                                                                                              | 72         |                                    |                              |            |             |
| Q6.4 Protein powder (Instant meat substitutes)                                                                                                                                                                   | 14         |                                    |                              |            |             |
| Q6.5 Legumes                                                                                                                                                                                                     | 84         |                                    |                              |            |             |
| Q6.6 Nuts                                                                                                                                                                                                        | 69         |                                    |                              |            |             |
| Q6.7 Seitan                                                                                                                                                                                                      | 19         |                                    |                              |            |             |
| Q6.8 Tempeh                                                                                                                                                                                                      | 14         |                                    |                              |            |             |
| Q6.9 Algae                                                                                                                                                                                                       | 19         |                                    |                              |            |             |
| Q6.10 Jellyfish                                                                                                                                                                                                  | 12         |                                    |                              |            |             |
| <b>Q7. In the future, would you be willing to replace meat with each of<br/>the following food items? (%)</b>                                                                                                    | <b>Yes</b> | <b>Yes, if<br/>to my<br/>taste</b> | <b>I do<br/>not<br/>know</b> | <b>No</b>  |             |
| Q7.1 Insects and insect derivates                                                                                                                                                                                | 7          | 6                                  | 67                           | 20         |             |
| Q7.2 Lab-grown meat (from cell culture)                                                                                                                                                                          | 12         | 8                                  | 61                           | 19         |             |
| Q7.3 Plant-based meat alternatives, only made from ingredients that are<br>not derived from Genetically Modified Organisms (GMO)                                                                                 | 20         | 11                                 | 47                           | 22         |             |
| Q7.4 Plant-based meat alternatives, even if made from ingredients<br>derived from Genetically Modified Organisms (GMO)                                                                                           | 11         | 6                                  | 61                           | 22         |             |
| <b>Q8. To what extent do you agree with each of the following<br/>statements?<br/>[answer from 1 (strongly disagree) to 10 (strongly agree)] (%)</b>                                                             | <b>1-2</b> | <b>3-4</b>                         | <b>5-6</b>                   | <b>7-8</b> | <b>9-10</b> |
| Q8.1 Eating meat is necessary to have a complete diet                                                                                                                                                            | 10         | 11                                 | 27                           | 31         | 21          |
| Q8.2 I need meat to have energy                                                                                                                                                                                  | 14         | 15                                 | 35                           | 27         | 9           |
| Q8.3 Eating meat allows me to have a balanced diet                                                                                                                                                               | 10         | 13                                 | 37                           | 29         | 11          |
| Q8.4 Meat is irreplaceable in my diet                                                                                                                                                                            | 19         | 15                                 | 32                           | 22         | 12          |
| Q8.5 Replacing meat with plant-based protein sources doesn't provide<br>me with the same energy                                                                                                                  | 19         | 15                                 | 38                           | 17         | 11          |
| <b>Q9. If all meat products comply with farm animal welfare rules and<br/>prices were to increase by 30% compared to current prices (Tick only<br/>one answer) (%)</b>                                           | <b>Yes</b> |                                    |                              |            |             |
| Q9.1 I would eat the same amount of meat products as I currently do                                                                                                                                              | 42         |                                    |                              |            |             |
| Q9.2 I would eat more meat products than I currently do                                                                                                                                                          | 13         |                                    |                              |            |             |
| Q9.3 I would eat less meat products than I currently do                                                                                                                                                          | 45         |                                    |                              |            |             |
| <b>Q10. To what extent do you agree that companies use meat-related<br/>names like 'sausage' and 'burger' to describe meat-free vegetarian<br/>products (e.g. a veggie 'burger')? (Tick only one answer) (%)</b> | <b>Yes</b> |                                    |                              |            |             |
| Q10.1 It should never be allowed for vegetarian products                                                                                                                                                         | 19         |                                    |                              |            |             |
| Q10.2 It should be allowed only if it is clearly labelled it's a vegetarian<br>product                                                                                                                           | 44         |                                    |                              |            |             |
| Q10.3 I don't see any problem for using such names                                                                                                                                                               | 23         |                                    |                              |            |             |
| Q10.4 I have no opinion                                                                                                                                                                                          | 14         |                                    |                              |            |             |
| <b>Q11. To what extent do you agree with each of the following<br/>statements?<br/>[answer from 1 (strongly disagree) to 10 (strongly agree)] (%)</b>                                                            | <b>1-2</b> | <b>3-4</b>                         | <b>5-6</b>                   | <b>7-8</b> | <b>9-10</b> |

|                                                                                                                                                                                        |            |            |            |            |             |
|----------------------------------------------------------------------------------------------------------------------------------------------------------------------------------------|------------|------------|------------|------------|-------------|
| Q11.1 Sustainability information should be compulsory on food labels                                                                                                                   | 3          | 7          | 24         | 31         | 35          |
| Q11.2 Food which is less sustainable should be more taxed (and be more expensive)                                                                                                      | 10         | 10         | 32         | 27         | 21          |
| Q11.3 Unsustainable food products should be pulled from shelves (e.g. no strawberries in winter, supermarkets should only sell fish sourced sustainably, etc.)                         | 10         | 16         | 29         | 26         | 19          |
| Q11.4 Farmers should be given incentives (e.g. through subsidies) to produce food more sustainably                                                                                     | 2          | 7          | 24         | 32         | 35          |
| Q11.5 The EU should not be more proactive on sustainable food policies unless other countries such as China or the USA do the same                                                     | 4          | 5          | 25         | 32         | 34          |
| Q11.6 Regulations should force farmers and food producers to meet more stringent sustainability standards (in terms of greenhouse gas emissions, water use, biodiversity impact, etc.) | 4          | 6          | 29         | 36         | 25          |
| <b>Q12. 12. To what extent do the following activities contribute to climate change?</b>                                                                                               | <b>1-2</b> | <b>3-4</b> | <b>5-6</b> | <b>7-8</b> | <b>9-10</b> |
| <b>[answer from 1 (strongly disagree) to 10 (strongly agree)] (%)</b>                                                                                                                  |            |            |            |            |             |
| Q12.1 Emissions from aircraft, trains, cars, trucks and ships                                                                                                                          | 3          | 7          | 17         | 30         | 43          |
| Q12.2 The production of meat and dairy products, which we eat and drink                                                                                                                | 5          | 9          | 30         | 34         | 22          |
| Q12.3 The felling of trees and forests                                                                                                                                                 | 2          | 4          | 17         | 28         | 49          |

**Supplementary Materials: Table S2** – Socio-demographic characteristics of the 5 clusters (number of weighted observations)

|                 |                                       | Cluster |       |       |       |       | Total |
|-----------------|---------------------------------------|---------|-------|-------|-------|-------|-------|
| Categories      |                                       | 1       | 2     | 3     | 4     | 5     |       |
| Gender          | Man                                   | 47.55   | 45.66 | 76.40 | 49.80 | 65.97 | 49.94 |
|                 | Woman                                 | 52.45   | 54.34 | 23.60 | 50.20 | 34.03 | 50.06 |
| Age group       | 18-35                                 | 30.56   | 25.87 | 32.53 | 28.18 | 29.49 | 28.29 |
|                 | 35-45                                 | 20.56   | 16.14 | 18.16 | 24.66 | 22.99 | 20.42 |
|                 | 45-55                                 | 32.44   | 21.48 | 32.30 | 25.28 | 19.38 | 25.92 |
|                 | 55-65                                 | 16.07   | 36.50 | 17.02 | 21.88 | 28.15 | 25.37 |
| Family          | No children                           | 63.36   | 71.93 | 24.12 | 55.70 | 62.60 | 62.04 |
|                 | Children ≤ 11                         | 19.79   | 13.42 | 61.67 | 26.43 | 26.21 | 21.95 |
|                 | Children > 11                         | 16.86   | 14.65 | 14.21 | 17.87 | 11.18 | 16.01 |
| Education level | Low                                   | 9.33    | 5.11  | 7.16  | 7.46  | 16.95 | 7.70  |
|                 | Middle-Low                            | 64.37   | 67.45 | 61.33 | 63.49 | 54.73 | 64.42 |
|                 | High-Middle                           | 18.24   | 9.51  | 14.60 | 12.08 | 16.62 | 13.18 |
|                 | High                                  | 8.06    | 17.93 | 16.91 | 16.98 | 11.70 | 14.70 |
| Urban           | ≤100.000                              | 80.54   | 73.26 | 77.68 | 82.27 | 75.92 | 78.29 |
|                 | >100.000                              | 19.46   | 26.74 | 22.32 | 17.73 | 24.08 | 21.71 |
| Italy's Areas   | North-west                            | 26.33   | 26.45 | 11.24 | 27.11 | 37.74 | 26.61 |
|                 | North-East                            | 20.89   | 17.00 | 44.38 | 16.75 | 23.64 | 19.49 |
|                 | Centre                                | 21.50   | 20.27 | 30.50 | 17.47 | 14.89 | 19.89 |
|                 | South                                 | 20.70   | 23.37 | 2.11  | 28.15 | 21.55 | 23.15 |
|                 | Islands                               | 10.58   | 12.91 | 11.77 | 10.53 | 2.19  | 10.90 |
| Job             | Student                               | 6.97    | 8.24  | 5.55  | 9.26  | 8.78  | 8.15  |
|                 | Homely/Housewife                      | 8.46    | 8.65  | 44.81 | 10.00 | 7.14  | 10.51 |
|                 | Retired                               | 4.07    | 7.36  | 0.00  | 1.90  | 1.02  | 4.12  |
|                 | Unemployed or looking for a first job | 7.85    | 8.14  | 1.24  | 5.77  | 9.40  | 7.10  |
|                 | Manual worker                         | 16.22   | 7.52  | 10.82 | 15.61 | 7.76  | 12.44 |
|                 | Employe                               | 35.20   | 37.86 | 21.88 | 36.60 | 41.01 | 36.27 |
|                 | Self-employed                         | 16.15   | 14.55 | 7.54  | 17.28 | 22.34 | 15.96 |
|                 | Others                                | 5.09    | 7.70  | 8.15  | 3.58  | 2.56  | 5.46  |
|                 |                                       |         |       |       |       |       |       |
| Income          | <18.000€                              | 18.05   | 29.87 | 4.94  | 17.46 | 24.91 | 21.67 |
|                 | 18.000-36.000€                        | 52.73   | 45.44 | 87.79 | 50.35 | 37.24 | 50.25 |
|                 | >36.000€                              | 29.22   | 24.69 | 7.27  | 32.19 | 37.85 | 28.19 |
